# Supplementary material for: c-Src functionality controls self-renewal and glucose metabolism in MCF7 breast cancer stem cells
Source: PubMed Central journal article supplement (PMC7365443; doi:10.1371/journal.pone.0235850), 2020-07-16
Supplement: pone.0235850.s001.pdf [file pone.0235850.s001.pdf]

# c-Src functionality controls self-renewal, tumorigenicity and glucose metabolism in breast cancer stem cells

Víctor Mayoral-Varo<sup>1\*</sup>, Annarica Calcabrini<sup>1,2\*</sup>, María Pilar Sánchez-Bailón<sup>1,3\*</sup>, Óscar H. Martínez-Costa<sup>1</sup>, Cristina González-Páramos<sup>1</sup>, Sergio Ciordia<sup>4</sup>, David Hardisson<sup>5,6</sup>, Juan J. Aragón<sup>1</sup>, Miguel Ángel Fernández-Moreno<sup>1,7</sup>, and Jorge Martín-Pérez<sup>1,6,‡</sup>

## Supplementary Materials:

**1. Supplementary Methods:** 1.1. Gene Set Enrichment Analyses (GSEA); 1.2. RNA preparation, qRT-PCR of c-Myc and HIF-1; 1.3. Detection of mitochondrial superoxide and reactive oxygen species (ROS).

**2. Supplementary figures and tables:** **2.1. Figure S1.** Flow cytometric analysis of isotopic immunoglobulin labeling. **2.2. Figure S2.** Three generations of mammospheres derived from MCF7-Tet-On-SrcDN. **2.3. Figure S3.** Flow cytometric analysis of CD24-PE and CD44-APC markers in control and Doxy-treated (2 µg/ml) 3<sup>rd</sup> generation mammospheres. **2.4. Figure S4.** Quantitative proteomic data from CD24<sup>+</sup> derived from MCF7-Tet-On-SrcDN. **2.5. Figure S5.** Gene set enrichment analysis (GSEA) of mammospheres derived from MCF7-Tet-On-c-SrcDN cells. **2.6. Figure S6.** c-Myc and HIF-1 expression. **2.7. Figure S7.** Profiles of oxygen consumption rates of mammospheres cells derived from MCF7-Tet-On-SrcDN. **2.8. Figure S8.** Detection of MitoSOX and ROS in CD24<sup>+</sup> cells derived from MCF7-Tet-On-SrcDN. **2.9.** List of Abbreviations. **2.10. Table S1.** Summary of quantitated proteomic analyses. **2.11. Table S2.** Antibodies employed in these studies. **2.12.** Reports of MCF7 cell line authentication. **2.13.** Figures S9, S10, S11, and S12. Uncropped scan of the western blots of the manuscript. **2.14.** Quantitation of WB.

## 3. References

## Supplementary Materials:

### 1. Supplementary Methods

#### 1.1. Gene Set Enrichment Analyses (GSEA)

The results of the quantitative proteomics analysis of BCSCs derived from MCF7-Tet-On-c-SrcDN showed a series of proteins whose levels were altered by the expression of c-SrcDN. These proteins were analyzed by GSEA, a computational method that determines whether a set of proteins/genes presents statistically significant differences between two samples.

#### 1.2. RNA preparation, qRT-PCR of c-Myc and Hif-1

RNA was isolated from three independent experiments performed in triplicate using RNeasy kit (Qiagen). After testing for RNA integrity, triplicate RNAs from each experiment were pooled, then 1 µg of the purified RNAs was employed to synthesize the corresponding cDNAs using the Maxima First Strand cDNA Synthesis Kit for RT-qPCR with dsDNase (Thermo Fisher Scientific), followed by SYBR green (PowerUp™ SYBR™ Green Master Mix, Thermo Fisher Scientific)

RTqPCR using an Applied Biosystems StepOnePlus™ real-time thermocycler (Thermo Fisher Scientific). Cycle thresholds were normalized to  $\beta$ -actin levels. Expression of c-Myc and HIF-1 was determined using the following primers: c-Myc, forward 5'-CCCGCTTCTCTGAAAGGCTCTC-3', reverse 5'-CTCTGCTGCTGCTGCTGGTAG-3'; HIF-1, forward: 5'-TTGATGGGATATGAGCCAGA-3', reverse: 5'-TGTCCCTGTGGTGACTTGTCC-3';  $\beta$ -actin (employed to normalize), forward 5'-GCGAGCACAGAGCCTCGCCTT-3', reverse 5'-CATCATCCATGGTGAGCTGGCGG-3'. Relative expression of c-Myc and HIF-1 was calculated as the difference in cycle threshold ( $\Delta$ Ct) between target gene and  $\beta$ -actin respectively;  $\Delta\Delta$ Ct was the difference between  $\Delta$ Ct values of test sample and that of control. Relative expression of target genes was calculated as  $2^{-\Delta\Delta$ Ct}.

### **1.3. Detection of mitochondrial superoxide and reactive oxygen species (ROS)**

Determination of Mitochondrial superoxide and ROS in CD24-neg cells derived from MCF7-Tet-ON-SrcDN in absence or presence of Doxy (2  $\mu$ g/mL) was carried out employing fluorescence dyes, MitoSOX red (Invitrogen, M36008), and DCFH-DA (abcam, ab113851), as described [1]. In parallel, from a portion of the same samples, the expression levels of catalase, and manganese superoxide dismutase (MnSOD) were determined by immunoblotting.

## 2. Supplementary figures and tables

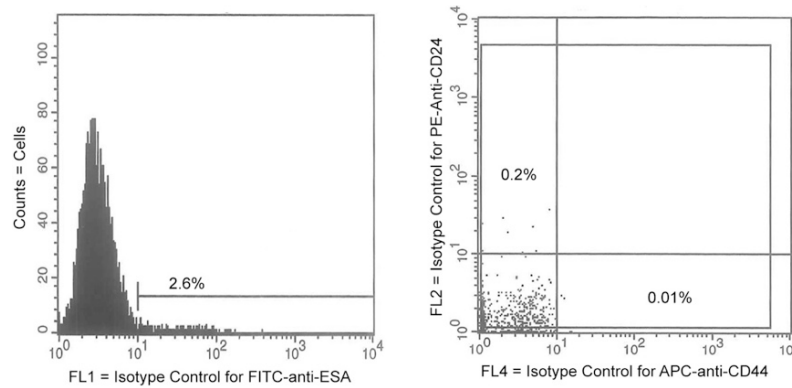

**2.1. Figure S1.** Flow cytometric analysis of isotypic immunoglobulin labelling. Cells were incubated with FITC-mouse IgG1 (isotypic control for ESA staining, histogram on the left), with PE-mouse IgG2a (isotypic control for CD24 labelling) and APC-mouse IgG2b (isotypic control for CD44 labelling), dot plot on the right. The percentage of positive cells are indicated. Results from one representative experiment.

Three generations of Mammospheres from MCF7-Tet-On-SrcDN

|           | 1 <sup>st</sup> generation |        | 2 <sup>nd</sup> generation |        | 3 <sup>rd</sup> generation |        |
|-----------|----------------------------|--------|----------------------------|--------|----------------------------|--------|
|           | - Doxy                     | + Doxy | - Doxy                     | + Doxy | - Doxy                     | + Doxy |
| Exp. 1    | 7.76                       | 2.84   | 9.99                       | 5.16   | 10.40                      | 6.70   |
| Exp. 2    | 4.99                       | 3.44   | 7.95                       | 5.43   | 10.80                      | 8.80   |
| Exp. 3    | 5.73                       | 3.73   | 6.50                       | 4.20   | 10.30                      | 8.10   |
| Exp. 4    | 8.56                       | 4.87   | 8.25                       | 6.44   | 9.60                       | 3.50   |
| Exp. 5    | 6.60                       | 4.00   | 10.50                      | 7.00   | 8.20                       | 3.90   |
| Mean      | 6.73                       | 3.78   | 8.64                       | 5.65   | 9.86                       | 6.21   |
| SD        | 1.5                        | 1.0    | 1.6                        | 1.0    | 1.0                        | 2.0    |
| t-Student | 0.004                      |        | 0.009                      |        | 0.014                      |        |
|           | p<0.01 **                  |        | p<0.01 **                  |        | p<0.5 *                    |        |

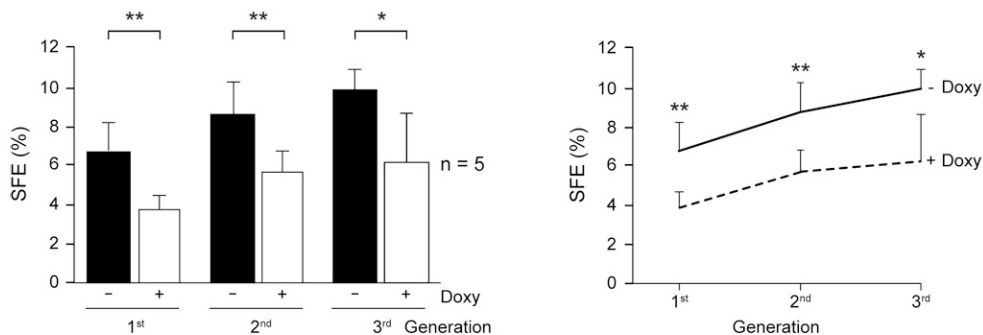

Figure S2

**2.2. Figure S2.** Three generations of mammospheres derived from MCF7-Tet-On-SrcDN. Cells were initially plated in 6-well ultralow attachment plates at  $2 \times 10^3$  cells/well in mammosphere culture media without Doxy. Fifteen days later, mammospheres were dissociated into single cells

that were plated in 6-well ultralow attachment plates at  $2 \times 10^3$  cells/well in mammosphere culture media, 3 wells without Doxy (Control) and 3 wells with Doxy ( $2 \mu\text{g/ml}$ ). These two groups were maintained during the three generations, as well as during the re-plating (see Materials and methods). All experiments were carried out in triplicates. Values represent the Mean $\pm$ -SD, n=5.

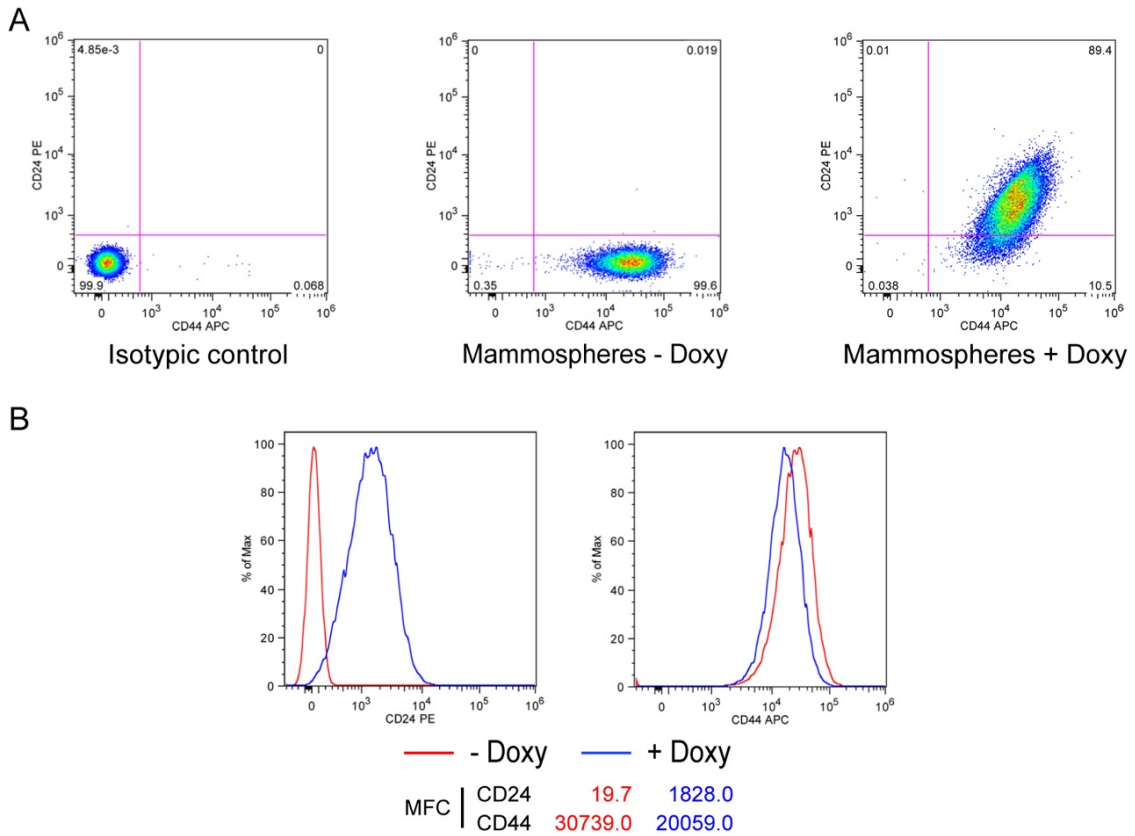

**FIGURE S3.** Flow cytometric analysis of CD24-PE and CD44-APC markers in control and Doxy-treated ( $2 \mu\text{g/ml}$ ) 3<sup>rd</sup> generation mammospheres. (A) Cells obtained from dissociated mammospheres were incubated with PE-mouse IgG2a and APC-mouse IgG2b immunoglobulins (dot plot on the left, isotypic control) or with anti-CD24-PE and anti-CD44-APC monoclonal antibodies (dot plots on the right, Mammospheres +/- Doxy). The percentage of cells in each quadrant is indicated. (B) Histograms showing CD24-PE and CD44-APC labelling in control (red line) and Doxy-treated (blue line) samples. The values of the mean fluorescence channel (MFC) related to CD24 and CD44 expression are reported. Results from one representative experiment.

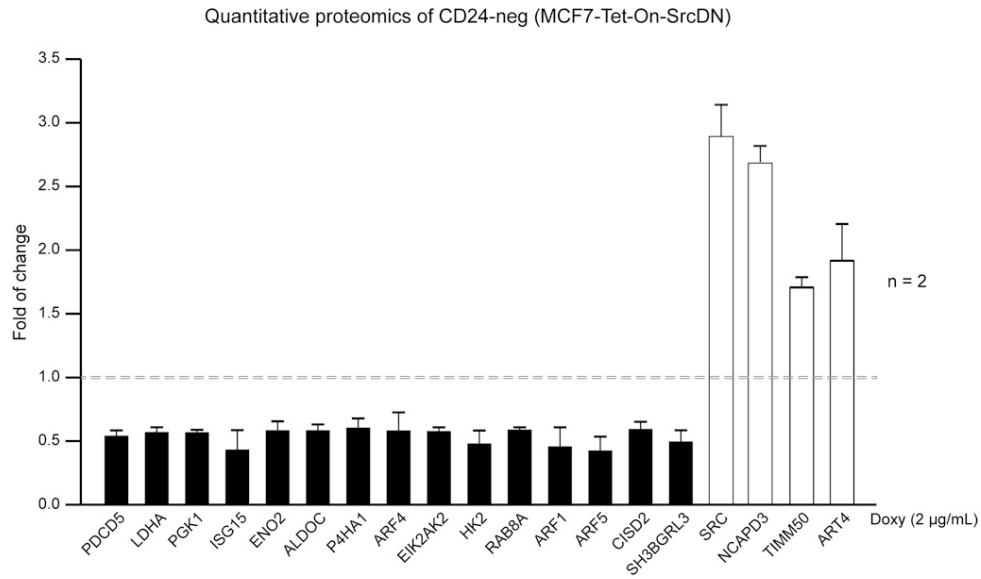

**2.4. Figure S4.** Quantitative proteomic data from mammospheres derived from MCF7-Tet-On-SrcDN. Graphic of bars from data shown in Table 1, refer to -Doxy considered as 1 (dashed line). Black bars showed proteins whose expression is reduced upon SrcDN induction, open bars represented proteins upregulated by SrcDN expression, showing c-Src increased up to three folds.

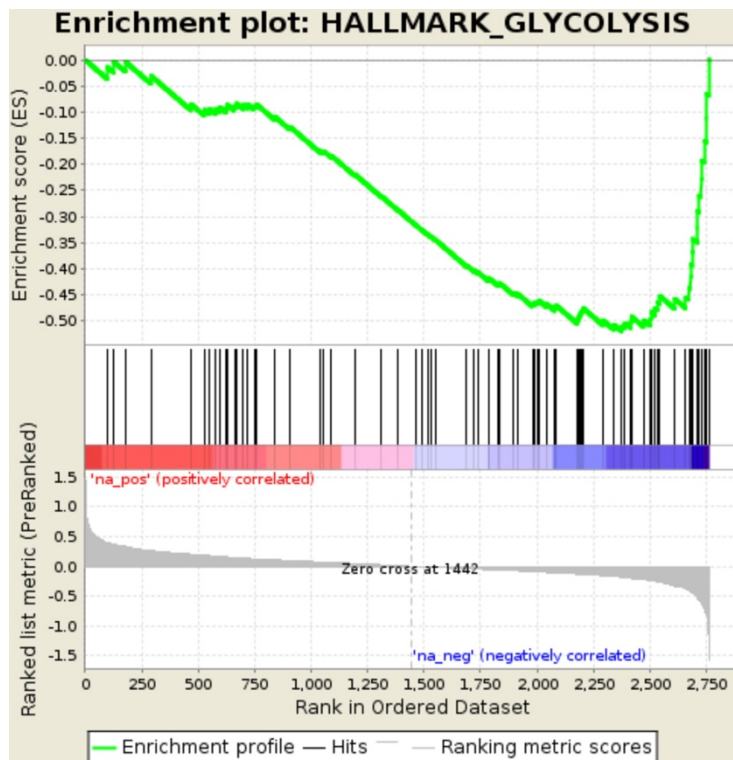

**2.5. Figure S5.** Gene set enrichment analysis (GSEA) of mammospheres derived from MCF7-Tet-On-c-SrcDN cells. A significant downregulation of proteins involved in glycolysis was detected in mammospheres upon expression of SrcDN.

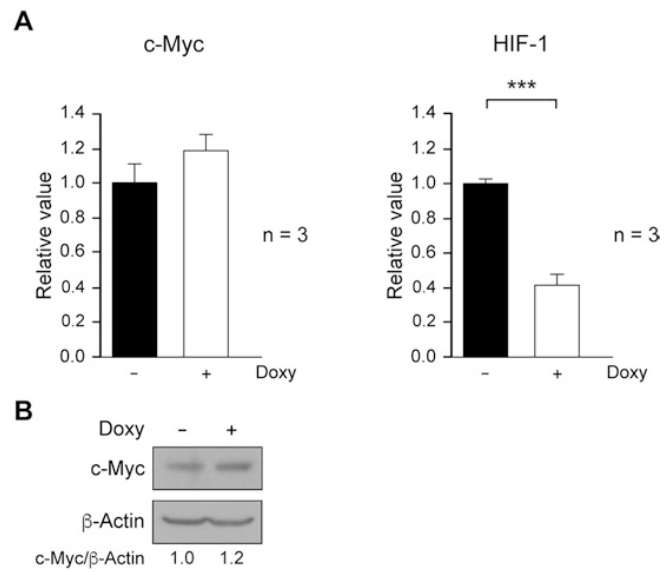

**2.6. Figure S6.** c-Myc and HIF-1 expression in control and Doxy-treated (2  $\mu\text{g}/\text{mL}$ ) 3<sup>rd</sup> mammosphere generation. **(A)** Expression of c-Myc and HIF-1 by SYBR Green q-RT-PCR using  $\beta$ -actin as endogenous gene (see Materials and methods). Results are shown as Mean  $\pm$  SD of relative levels in three independent experiments, considering arbitrarily -Doxy (Control) as 1 (\*\* $p < 0.001$ ). **(B)** Immunoblotting analysis of c-Myc expression employing  $\beta$ -actin as loading control. Results are referred to -Doxy (Control) considered as 1.

## OCR Profiles

### Control with Pyruvate

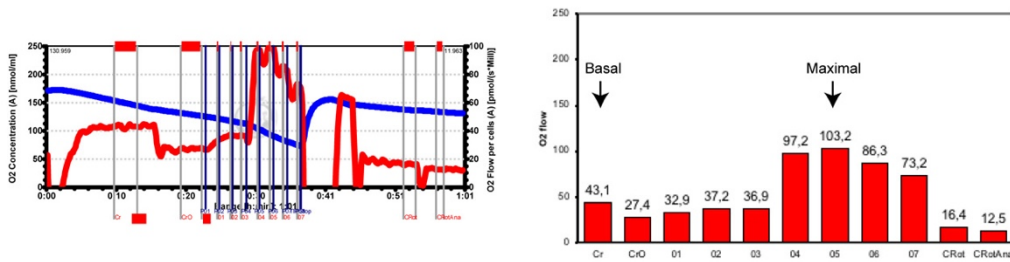

### Doxy with Pyruvate

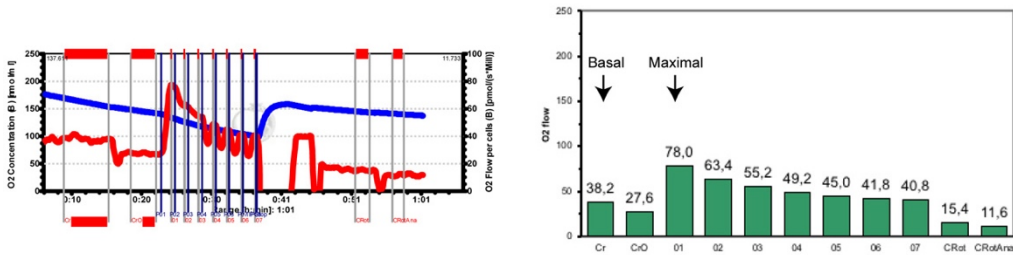

### Control without Pyruvate

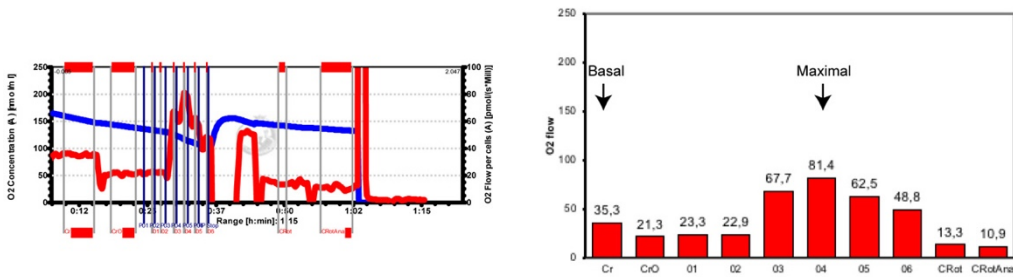

### Doxy without Pyruvate

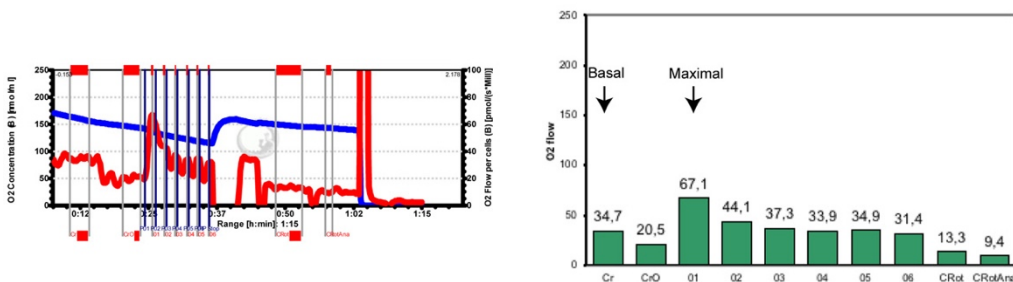

**2.7. Figure S7.** Profiles of oxygen consumption rates in 3<sup>rd</sup> generation mammosphere cells derived from MCF7-Tet-On-SrcDN. Experiments were carried out as described in main document. Representative profiles of OCR from mammosphere cells and graphic bars showing Basal and Maximal consumption measured in mammospheres culture media with and without pyruvate.

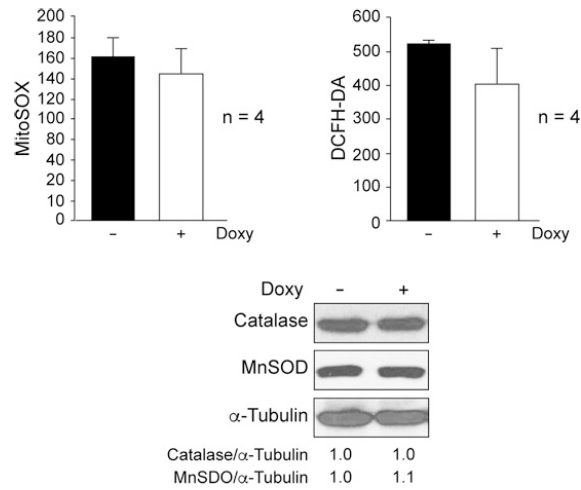

**2.8. Figure S8.** Detection of MitoSOX and ROS in 3<sup>rd</sup> generation mammosphere cells derived from MCF7-Tet-On-SrcDN. Mitochondrial superoxide and ROS determined in mammosphere cells derived from MCF7-Tet-ON-SrcDN in absence or presence of Doxy (2  $\mu$ g/mL) was carried by flow cytometry, were quantified in arbitrary units. From a portion of the same samples, the expression levels of catalase and MnSOD from mammosphere cells was determined by immunoblotting, employing  $\alpha$ -Tubulin as a loading control. These are representative results from 4 independent experiments. The ratios refer to -Doxy considered as 1.



**c-Src functionality controls self-renewal, tumorigenicity and glucose metabolism in breast cancer stem cells, by V. Mayoral et al.**

List of abbreviations:

|                 |                                                        |
|-----------------|--------------------------------------------------------|
| APC             | Allophycocyanin                                        |
| ATP             | Adenosine triphosphate                                 |
| BCSCs           | Breast Cancer Stem Cells                               |
| BSA             | Bovine Serum Albumin                                   |
| CSK             | C-terminal Src Kinase                                  |
| CD24-pos        | CD24-high or CD24 positive                             |
| CD24-neg        | CD24-low or CD24 negative                              |
| DAPI            | 4', 6-diamidino-2-phenylindole                         |
| DCFH-DA         | Dichloro-dihydro-fluorescein diacetate                 |
| DMEM            | Dulbecco's Modified Eagle's Medium                     |
| Doxy            | Doxycycline (analogue of Tetracycline)                 |
| EGF             | Epidermal Growth Factor                                |
| ESA             | Epithelial Specific Antigen                            |
| FCS             | Fetal Calf Serum                                       |
| FDR             | False Discovery Rate                                   |
| bFGF            | basic Fibroblast Growth Factor                         |
| FITC            | Fluorescein Isothiocyanate                             |
| FACS            | Fluorescence-Activated Cell Sorting                    |
| Fak             | Focal adhesion kinase                                  |
| G6PD            | Glucose-6-phosphate-Dehydrogenase                      |
| GAPDH           | Glyceraldehyde-3-phosphate-Dehydrogenase               |
| Glut-1          | Glucose Transporter 1                                  |
| GSEA            | Gene Set Enrichment Analysis                           |
| HK              | Hexokinase                                             |
| LDH             | Lactate dehydrogenase                                  |
| MCT-1 (SLC16A1) | Proton coupled monocarboxylate transporter-1           |
| MMP2, MMP7      | Metalloproteinase 2 or 7                               |
| MnSOD           | Manganese-dependent Superoxide Dismutase               |
| MAb             | Monoclonal Antibody                                    |
| NAD             | Nicotinamide Adenine Dinucleotide                      |
| OCR             | Oxygen consumption rate                                |
| PARP            | Poly (ADP-ribose) polymerases                          |
| PBS             | Phosphate Buffered Saline                              |
| PE              | Phycoerythrin                                          |
| PK              | Pyruvate Kinase                                        |
| ROS             | Reactive Oxygen Species                                |
| SD              | Standard Deviation                                     |
| SFE             | Sphere Formation Efficiency (self-renewal)             |
| SFKs            | Src-family tyrosine kinases                            |
| shRNA           | Short hairpin RNA                                      |
| SrcDN           | Dominant negative variant of c-Src (c-Src-K295M/Y527F) |
| Tet-On system   | Doxycycline-inducible Gene Expression                  |

From Table I

|             |                                                                  |
|-------------|------------------------------------------------------------------|
| ALDOC       | Fructose-bisphosphate aldolase C                                 |
| ARF1        | ADP-ribosylation factor 1                                        |
| ARF4        | ADP-ribosylation factor 4                                        |
| ARF5        | ADP-ribosylation factor 5                                        |
| ART4        | Ecto-ADP-ribosyltransferase 4                                    |
| CISD2       | CDSH iron-sulfur domain-containing protein                       |
| EIF2AK2     | Interferon-induced, double-stranded RNA-activated protein kinase |
| ENO2        | Gamma-enolase                                                    |
| HK2         | Hexokinase-2                                                     |
| ISG15       | Ubiquitin-like protein ISG15                                     |
| LDHA        | L-lactate dehydrogenase A chain                                  |
| NCAPD3      | Condensin-2 complex subunit D3                                   |
| P4HA1       | Prolyl 4-hydroxylase subunit alpha-1                             |
| PDCD5       | Programmed cell death protein 5                                  |
| PGK1        | Phosphoglycerate kinase 1                                        |
| RAB8A       | Ras-related protein Rab-8A                                       |
| SH3BGRL3    | SH3 domain-binding glutamic acid-rich-like protein 3             |
| SRC (c-Src) | Proto-oncogene tyrosine-protein kinase Src                       |
| TIMM50      | Mitochondrial import inner membrane translocase subunit TIM50    |

## 2.9. List of abbreviations

| DIFFERENTIAL PROTEINS FOR 5% FDR AT QUANTITATION LEVEL |                                                                                                       | Doxy-1/Control-1 |        |         | Doxy-2/Control-2 |        |        |
|--------------------------------------------------------|-------------------------------------------------------------------------------------------------------|------------------|--------|---------|------------------|--------|--------|
| Protein_AC                                             | Description                                                                                           | Ratio            | Log2   | FDR     | Ratio            | Log2   | FDR    |
| A6NFQ2                                                 | Protein FAM115C OS=Homo sapiens GN=FAM115C PE=2 SV=2                                                  | 1,034            | 0,049  | 100,28% | 0,660            | -0,599 | 1,86%  |
| O14737                                                 | Programmed cell death protein 5 OS=Homo sapiens GN=PDCD5 PE=1 SV=3                                    | 0,527            | -0,923 | 0,33%   | 0,576            | -0,797 | 0,06%  |
| O14745                                                 | Na(+)/H(+) exchange regulatory cofactor NHE-RF1 OS=Homo sapiens GN=SLC9A3R1 PE=1 SV=4                 | 0,845            | -0,244 | 87,65%  | 0,619            | -0,692 | 0,42%  |
| O14773                                                 | Tripeptidyl-peptidase 1 OS=Homo sapiens GN=TPP1 PE=1 SV=2                                             | 1,235            | 0,304  | 93,56%  | 1,620            | 0,696  | 3,35%  |
| O43852                                                 | Calumenin OS=Homo sapiens GN=CALU PE=1 SV=2                                                           | 1,248            | 0,320  | 91,88%  | 0,633            | -0,659 | 0,67%  |
| O75506                                                 | Heat shock factor-binding protein 1 OS=Homo sapiens GN=HSBP1 PE=1 SV=1                                | 0,504            | -0,987 | 0,14%   | 0,842            | -0,248 | 70,65% |
| O94855                                                 | Protein transport protein Sec24D OS=Homo sapiens GN=SEC24D PE=1 SV=2                                  | 0,906            | -0,142 | 97,19%  | 0,656            | -0,609 | 1,62%  |
| O95197                                                 | Reticulon-3 OS=Homo sapiens GN=RTN3 PE=1 SV=2                                                         | 0,593            | -0,755 | 2,65%   | 0,956            | -0,065 | 95,30% |
| O95400                                                 | CD2 antigen cytoplasmic tail-binding protein 2 OS=Homo sapiens GN=CD2BP2 PE=1 SV=1                    | 1,020            | 0,028  | 99,71%  | 0,668            | -0,581 | 2,43%  |
| P00338                                                 | L-lactate dehydrogenase A chain OS=Homo sapiens GN=LDHA PE=1 SV=2                                     | 0,589            | -0,764 | 2,36%   | 0,567            | -0,818 | 0,04%  |
| P00441                                                 | Superoxide dismutase [Cu-Zn] OS=Homo sapiens GN=SOD1 PE=1 SV=2                                        | 1,051            | 0,072  | 100,25% | 0,603            | -0,731 | 0,20%  |
| P00558                                                 | Phosphoglycerate kinase 1 OS=Homo sapiens GN=PGK1 PE=1 SV=3                                           | 0,583            | -0,777 | 2,05%   | 0,569            | -0,813 | 0,04%  |
| P01023                                                 | Alpha-2-macroglobulin OS=Homo sapiens GN=A2M PE=1 SV=3                                                | 0,880            | -0,185 | 93,98%  | 0,457            | -1,128 | 0,00%  |
| P02538                                                 | Keratin, type II cytoskeletal 6A OS=Homo sapiens GN=KRT6A PE=1 SV=3                                   | 2,912            | 1,542  | 0,00%   | 1,101            | 0,139  | 98,08% |
| P02768                                                 | Serum albumin OS=Homo sapiens GN=ALB PE=1 SV=2                                                        | 3,049            | 1,608  | 0,00%   | 1,647            | 0,720  | 2,30%  |
| P02792                                                 | Ferritin light chain OS=Homo sapiens GN=FTL PE=1 SV=2                                                 | 1,362            | 0,446  | 72,52%  | 0,588            | -0,766 | 0,09%  |
| P02794                                                 | Ferritin heavy chain OS=Homo sapiens GN=FTH1 PE=1 SV=2                                                | 0,934            | -0,098 | 97,89%  | 0,630            | -0,666 | 0,59%  |
| P04264                                                 | Keratin, type II cytoskeletal 1 OS=Homo sapiens GN=KRT1 PE=1 SV=6                                     | 2,991            | 1,581  | 0,00%   | 0,927            | -0,109 | 94,84% |
| P04350                                                 | Tubulin beta-4A chain OS=Homo sapiens GN=TUBB4A PE=1 SV=2                                             | 0,547            | -0,871 | 0,68%   | 1,280            | 0,356  | 76,52% |
| P05161                                                 | Ubiquitin-like protein ISG15 OS=Homo sapiens GN=ISG15 PE=1 SV=5                                       | 0,540            | -0,889 | 0,54%   | 0,337            | -1,568 | 0,00%  |
| P05387                                                 | 60S acidic ribosomal protein P2 OS=Homo sapiens GN=RPLP2 PE=1 SV=1                                    | 0,588            | -0,766 | 2,34%   | 0,809            | -0,307 | 48,87% |
| P06703                                                 | Protein S100-A6 OS=Homo sapiens GN=S100A6 PE=1 SV=1                                                   | 0,813            | -0,298 | 76,92%  | 0,474            | -1,076 | 0,00%  |
| P08779                                                 | Keratin, type I cytoskeletal 16 OS=Homo sapiens GN=KRT16 PE=1 SV=4                                    | 2,164            | 1,114  | 0,13%   | 1,090            | 0,124  | 99,00% |
| P09104                                                 | Gamma-enolase OS=Homo sapiens GN=ENO2 PE=1 SV=3                                                       | 0,541            | -0,885 | 0,56%   | 0,642            | -0,639 | 0,94%  |
| P09972                                                 | Fructose-bisphosphate aldolase C OS=Homo sapiens GN=ALDOC PE=1 SV=2                                   | 0,569            | -0,812 | 1,37%   | 0,612            | -0,708 | 0,31%  |
| P10412                                                 | Histone H1.4 OS=Homo sapiens GN=HIST1H1E PE=1 SV=2                                                    | 2,303            | 1,204  | 0,03%   | 1,252            | 0,324  | 83,43% |
| P10606                                                 | Cytochrome c oxidase subunit 5B, mitochondrial OS=Homo sapiens GN=COX5B PE=1 SV=2                     | 0,765            | -0,387 | 62,42%  | 0,629            | -0,669 | 0,59%  |
| P10636                                                 | Microtubule-associated protein tau OS=Homo sapiens GN=MAPT PE=1 SV=5                                  | 1,072            | 0,100  | 99,29%  | 0,662            | -0,595 | 1,93%  |
| P12429                                                 | Annexin A3 OS=Homo sapiens GN=ANXA3 PE=1 SV=3                                                         | 1,970            | 0,978  | 0,74%   | 1,353            | 0,437  | 50,49% |
| P12931                                                 | Proto-oncogene tyrosine-protein kinase Src OS=Homo sapiens GN=SRC PE=1 SV=3                           | 3,079            | 1,622  | 0,00%   | 2,738            | 1,453  | 0,00%  |
| P13645                                                 | Keratin, type I cytoskeletal 10 OS=Homo sapiens GN=KRT10 PE=1 SV=6                                    | 2,615            | 1,387  | 0,00%   | 1,497            | 0,582  | 14,78% |
| P13647                                                 | Keratin, type II cytoskeletal 5 OS=Homo sapiens GN=KRT5 PE=1 SV=3                                     | 3,290            | 1,718  | 0,00%   | 1,383            | 0,468  | 41,10% |
| P13674                                                 | Prolyl 4-hydroxylase subunit alpha-1 OS=Homo sapiens GN=P4HA1 PE=1 SV=2                               | 0,572            | -0,807 | 1,41%   | 0,653            | -0,616 | 1,45%  |
| P15559                                                 | NAD(P)H dehydrogenase [quinone] 1 OS=Homo sapiens GN=NQO1 PE=1 SV=1                                   | 1,911            | 0,935  | 1,36%   | 1,363            | 0,447  | 46,57% |
| P15941                                                 | Mucin-1 OS=Homo sapiens GN=MUC1 PE=1 SV=3                                                             | 0,719            | -0,477 | 41,20%  | 0,685            | -0,546 | 4,33%  |
| P16188                                                 | HLA class I histocompatibility antigen, A-30 alpha chain OS=Homo sapiens GN=HLA-A PE=1 SV=2           | 0,762            | -0,392 | 62,05%  | 0,593            | -0,754 | 0,12%  |
| P16455                                                 | Methylated-DNA-protein-cysteine methyltransferase OS=Homo sapiens GN=MGMT PE=1 SV=1                   | 1,006            | 0,009  | 99,80%  | 1,775            | 0,828  | 0,41%  |
| P16949                                                 | Stathmin OS=Homo sapiens GN=STMN1 PE=1 SV=3                                                           | 0,800            | -0,322 | 74,31%  | 0,669            | -0,580 | 2,43%  |
| P17655                                                 | Calpain-2 catalytic subunit OS=Homo sapiens GN=CAPN2 PE=1 SV=6                                        | 2,078            | 1,055  | 0,27%   | 0,988            | -0,018 | 98,23% |
| P18085                                                 | ADP-ribosylation factor 4 OS=Homo sapiens GN=ARF4 PE=1 SV=3                                           | 0,494            | -1,017 | 0,09%   | 0,684            | -0,549 | 4,15%  |
| P19525                                                 | Interferon-induced, double-stranded RNA-activated protein kinase OS=Homo sapiens GN=EIF2AK2 PE=1 SV=2 | 0,571            | -0,807 | 1,43%   | 0,594            | -0,751 | 0,13%  |
| P20933                                                 | N(4)-(beta-N-acetylglucosaminy)-L-asparaginase OS=Homo sapiens GN=AGA PE=1 SV=2                       | 2,058            | 1,042  | 0,33%   | 1,388            | 0,473  | 40,60% |
| P30838                                                 | Aldehyde dehydrogenase, dimeric NADP-preferring OS=Homo sapiens GN=ALDH3A1 PE=1 SV=3                  | 1,980            | 0,986  | 0,68%   | 1,574            | 0,655  | 6,25%  |
| P35527                                                 | Keratin, type I cytoskeletal 9 OS=Homo sapiens GN=KRT9 PE=1 SV=3                                      | 3,190            | 1,674  | 0,00%   | 0,696            | -0,523 | 6,20%  |
| P35908                                                 | Keratin, type II cytoskeletal 2 epidermal OS=Homo sapiens GN=KRT2 PE=1 SV=2                           | 2,641            | 1,401  | 0,00%   | 1,557            | 0,639  | 7,66%  |
| P40616                                                 | ADP-ribosylation factor-like protein 1 OS=Homo sapiens GN=ARL1 PE=1 SV=1                              | 0,595            | -0,750 | 2,83%   | 0,777            | -0,364 | 35,74% |
| P42224                                                 | Signal transducer and activator of transcription 1-alpha/beta OS=Homo sapiens GN=STAT1 PE=1 SV=2      | 0,728            | -0,459 | 45,86%  | 0,580            | -0,785 | 0,07%  |
| P42695                                                 | Condensin-2 complex subunit D3 OS=Homo sapiens GN=NCAPD3 PE=1 SV=2                                    | 2,595            | 1,376  | 0,00%   | 2,776            | 1,473  | 0,00%  |



|        |                                                                                                   |       |        |        |       |        |         |
|--------|---------------------------------------------------------------------------------------------------|-------|--------|--------|-------|--------|---------|
| P43487 | Ran-specific GTPase-activating protein OS=Homo sapiens GN=RANBP1 PE=1 SV=1                        | 0,836 | -0,258 | 84,90% | 0,636 | -0,653 | 0,74%   |
| P45973 | Chromobox protein homolog 5 OS=Homo sapiens GN=CBX5 PE=1 SV=1                                     | 0,896 | -0,158 | 97,12% | 0,666 | -0,586 | 2,26%   |
| P49207 | 60S ribosomal protein L34 OS=Homo sapiens GN=RPL34 PE=1 SV=3                                      | 1,859 | 0,894  | 2,05%  | 1,163 | 0,218  | 95,08%  |
| P51153 | Ras-related protein Rab-13 OS=Homo sapiens GN=RAB13 PE=1 SV=1                                     | 0,774 | -0,370 | 65,52% | 0,674 | -0,570 | 2,88%   |
| P51858 | Hepatoma-derived growth factor OS=Homo sapiens GN=HDGF PE=1 SV=1                                  | 0,821 | -0,285 | 79,15% | 0,452 | -1,144 | 0,00%   |
| P52789 | Hexokinase-2 OS=Homo sapiens GN=HK2 PE=1 SV=2                                                     | 0,546 | -0,874 | 0,67%  | 0,428 | -1,226 | 0,00%   |
| P54252 | Ataxin-3 OS=Homo sapiens GN=ATXN3 PE=1 SV=4                                                       | 1,524 | 0,608  | 37,92% | 1,661 | 0,732  | 1,85%   |
| P56589 | Peroxisomal biogenesis factor 3 OS=Homo sapiens GN=PEX3 PE=1 SV=1                                 | 0,588 | -0,765 | 2,33%  | 0,870 | -0,200 | 79,65%  |
| P61006 | Ras-related protein Rab-8A OS=Homo sapiens GN=RAB8A PE=1 SV=1                                     | 0,585 | -0,773 | 2,14%  | 0,606 | -0,722 | 0,24%   |
| P62158 | Calmodulin OS=Homo sapiens GN=CALM1 PE=1 SV=2                                                     | 1,147 | 0,197  | 97,93% | 0,586 | -0,770 | 0,09%   |
| P62330 | ADP-ribosylation factor 6 OS=Homo sapiens GN=ARF6 PE=1 SV=2                                       | 0,507 | -0,979 | 0,16%  | 0,773 | -0,371 | 33,35%  |
| P68366 | Tubulin alpha-4A chain OS=Homo sapiens GN=TUBA4A PE=1 SV=1                                        | 1,818 | 0,862  | 3,05%  | 0,963 | -0,054 | 95,41%  |
| P80303 | Nucleobindin-2 OS=Homo sapiens GN=NUCB2 PE=1 SV=2                                                 | 2,128 | 1,089  | 0,18%  | 1,565 | 0,647  | 6,88%   |
| P84077 | ADP-ribosylation factor 1 OS=Homo sapiens GN=ARF1 PE=1 SV=2                                       | 0,363 | -1,464 | 0,00%  | 0,559 | -0,838 | 0,03%   |
| P84085 | ADP-ribosylation factor 5 OS=Homo sapiens GN=ARF5 PE=1 SV=2                                       | 0,365 | -1,452 | 0,00%  | 0,497 | -1,009 | 0,00%   |
| Q01650 | Large neutral amino acids transporter small subunit 1 OS=Homo sapiens GN=SLC7A5 PE=1 SV=2         | 2,081 | 1,057  | 0,27%  | 0,948 | -0,077 | 95,84%  |
| Q08380 | Galectin-3-binding protein OS=Homo sapiens GN=LGALS3BP PE=1 SV=1                                  | 0,631 | -0,664 | 7,92%  | 0,402 | -1,315 | 0,00%   |
| Q13185 | Chromobox protein homolog 3 OS=Homo sapiens GN=CBX3 PE=1 SV=4                                     | 0,898 | -0,155 | 97,30% | 0,681 | -0,554 | 3,83%   |
| Q13268 | Dehydrogenase/reductase SDR family member 2, mitochondrial OS=Homo sapiens GN=DHRS2 PE=1 SV=4     | 1,498 | 0,583  | 45,23% | 0,630 | -0,667 | 0,60%   |
| Q14244 | Enscosin OS=Homo sapiens GN=MAP7 PE=1 SV=1                                                        | 1,864 | 0,898  | 2,02%  | 1,108 | 0,148  | 97,92%  |
| Q14683 | Structural maintenance of chromosomes protein 1A OS=Homo sapiens GN=SMC1A PE=1 SV=2               | 0,531 | -0,912 | 0,39%  | 0,919 | -0,122 | 93,63%  |
| Q14956 | Transmembrane glycoprotein NMB OS=Homo sapiens GN=GPNMB PE=1 SV=2                                 | 5,566 | 2,477  | 0,00%  | 1,765 | 0,820  | 0,45%   |
| Q15125 | 3-beta-hydroxysteroid-Delta(8),Delta(7)-isomerase OS=Homo sapiens GN=EBP PE=1 SV=3                | 1,571 | 0,651  | 27,03% | 0,614 | -0,704 | 0,34%   |
| Q16881 | Thioredoxin reductase 1, cytoplasmic OS=Homo sapiens GN=TXNRD1 PE=1 SV=3                          | 2,022 | 1,016  | 0,47%  | 1,274 | 0,349  | 76,64%  |
| Q3ZCQ8 | Mitochondrial import inner membrane translocase subunit TIM50 OS=Homo sapiens GN=TIMM50 PE=1 SV=2 | 1,769 | 0,823  | 4,91%  | 1,673 | 0,743  | 1,65%   |
| Q53HC9 | Protein TSSC1 OS=Homo sapiens GN=TSSC1 PE=1 SV=2                                                  | 1,805 | 0,852  | 3,44%  | 1,509 | 0,594  | 13,37%  |
| Q53SF7 | Cordon-bleu protein-like 1 OS=Homo sapiens GN=COBLL1 PE=1 SV=2                                    | 0,897 | -0,157 | 97,28% | 1,758 | 0,814  | 0,50%   |
| Q58FF6 | Putative heat shock protein HSP 90-beta 4 OS=Homo sapiens GN=HSP90AB4P PE=5 SV=1                  | 4,042 | 2,015  | 0,00%  | 1,040 | 0,057  | 100,69% |
| Q5RKV6 | Exosome complex component MTR3 OS=Homo sapiens GN=EXOSC6 PE=1 SV=1                                | 1,330 | 0,412  | 76,64% | 1,769 | 0,823  | 0,43%   |
| Q8N5K1 | CDGSH iron-sulfur domain-containing protein 2 OS=Homo sapiens GN=CISD2 PE=1 SV=1                  | 0,567 | -0,818 | 1,36%  | 0,636 | -0,652 | 0,75%   |
| Q8NEZ2 | Vacuolar protein sorting-associated protein 37A OS=Homo sapiens GN=VPS37A PE=1 SV=1               | 1,265 | 0,340  | 89,30% | 0,485 | -1,044 | 0,00%   |
| Q8WVY7 | Ubiquitin-like domain-containing CTD phosphatase 1 OS=Homo sapiens GN=UBLCP1 PE=1 SV=2            | 1,930 | 0,949  | 1,14%  | 0,969 | -0,046 | 96,18%  |
| Q93070 | Ecto-ADP-ribosyltransferase 4 OS=Homo sapiens GN=ART4 PE=2 SV=2                                   | 2,120 | 1,084  | 0,18%  | 1,746 | 0,804  | 0,59%   |
| Q96GW9 | Methionine-tRNA ligase, mitochondrial OS=Homo sapiens GN=MARS2 PE=1 SV=2                          | 1,139 | 0,188  | 97,48% | 1,951 | 0,964  | 0,03%   |
| Q96HE7 | ERO1-like protein alpha OS=Homo sapiens GN=ERO1L PE=1 SV=2                                        | 0,901 | -0,151 | 96,74% | 0,651 | -0,618 | 1,41%   |
| Q99622 | Protein C10 OS=Homo sapiens GN=C12orf57 PE=1 SV=1                                                 | 0,317 | -1,658 | 0,00%  | 0,586 | -0,771 | 0,09%   |
| Q99988 | Growth/differentiation factor 15 OS=Homo sapiens GN=GDF15 PE=1 SV=3                               | 1,862 | 0,897  | 2,03%  | 1,325 | 0,406  | 63,48%  |
| Q9BQE5 | Apolipoprotein L2 OS=Homo sapiens GN=APOL2 PE=1 SV=1                                              |       |        |        | 0,688 | -0,539 | 4,83%   |
| Q9BU89 | Deoxyhypusine hydroxylase OS=Homo sapiens GN=DOHH PE=1 SV=1                                       | 1,039 | 0,055  | 99,94% | 1,888 | 0,917  | 0,07%   |
| Q9GZM5 | Protein YIPF3 OS=Homo sapiens GN=YIPF3 PE=1 SV=1                                                  | 1,795 | 0,844  | 3,78%  | 0,854 | -0,227 | 75,18%  |
| Q9H299 | SH3 domain-binding glutamic acid-rich-like protein 3 OS=Homo sapiens GN=SH3BGLR3 PE=1 SV=1        | 0,550 | -0,862 | 0,74%  | 0,454 | -1,139 | 0,00%   |
| Q9H3K6 | BOLA-like protein 2 OS=Homo sapiens GN=BOLA2 PE=1 SV=1                                            | 0,891 | -0,166 | 94,93% | 0,657 | -0,606 | 1,69%   |
| Q9H4I2 | Zinc fingers and homeoboxes protein 3 OS=Homo sapiens GN=ZHX3 PE=1 SV=3                           | 0,900 | -0,151 | 96,95% | 0,657 | -0,605 | 1,66%   |
| Q9NP97 | Dynein light chain roadblock-type 1 OS=Homo sapiens GN=DYNLRB1 PE=1 SV=3                          | 0,676 | -0,564 | 21,13% | 0,637 | -0,650 | 0,77%   |
| Q9NZT2 | Opioid growth factor receptor OS=Homo sapiens GN=OGFR PE=1 SV=3                                   | 0,553 | -0,855 | 0,79%  | 0,731 | -0,451 | 14,41%  |
| Q9NZZ3 | Charged multivesicular body protein 5 OS=Homo sapiens GN=CHMP5 PE=1 SV=1                          | 0,978 | -0,033 | 99,42% | 0,671 | -0,576 | 2,61%   |
| Q9P2D3 | HEAT repeat-containing protein 5B OS=Homo sapiens GN=HEATR5B PE=1 SV=2                            | 0,562 | -0,831 | 1,12%  | 0,986 | -0,020 | 98,15%  |
| Q9UIG0 | Tyrosine-protein kinase BAZ1B OS=Homo sapiens GN=BAZ1B PE=1 SV=2                                  | 1,275 | 0,351  | 87,99% | 1,752 | 0,809  | 0,54%   |
| Q9UII2 | ATPase inhibitor, mitochondrial OS=Homo sapiens GN=ATPIF1 PE=1 SV=1                               | 0,756 | -0,404 | 58,80% | 0,565 | -0,823 | 0,03%   |
| Q9UK22 | F-box only protein 2 OS=Homo sapiens GN=FBXO2 PE=1 SV=2                                           | 0,568 | -0,816 | 1,33%  | 0,780 | -0,358 | 37,06%  |

|               |                                                                               |              |               |              |              |              |              |
|---------------|-------------------------------------------------------------------------------|--------------|---------------|--------------|--------------|--------------|--------------|
| <b>Q9UNL2</b> | Translocon-associated protein subunit gamma OS=Homo sapiens GN=SSR3 PE=1 SV=1 | <b>0,600</b> | <b>-0,737</b> | <b>3,36%</b> | 0,966        | -0,050       | 95,56%       |
| <b>Q9Y2K7</b> | Lysine-specific demethylase 2A OS=Homo sapiens GN=KDM2A PE=1 SV=3             | 0,964        | -0,053        | 99,25%       | <b>1,686</b> | <b>0,753</b> | <b>1,41%</b> |
| <b>Q9Y6K5</b> | 2~-5~-oligoadenylate synthase 3 OS=Homo sapiens GN=OAS3 PE=1 SV=3             | <b>0,429</b> | <b>-1,220</b> | <b>0,00%</b> | 0,769        | -0,380       | 31,08%       |

**Down-expressed**  
**Up-expressed**

**Significant (FDR<1%)**  
**Significant (1%<FDR<5%)**  
Non-significant FDR>5%

**2.10. Table S1.** Summary of quantitated proteomics analyses from MCF7-Tet-On-SrcDN mammospheres.

**Table S2. Detailed information for antibodies used in this work.**

| Name                                                    | Type              | Supplier                         | Catalog #  | Origin                      | Dilution Ratio<br>WB*-FC/IF**-IHC*** |
|---------------------------------------------------------|-------------------|----------------------------------|------------|-----------------------------|--------------------------------------|
| β-Actin                                                 | mouse monoclonal  | Sigma-Aldrich (Merck)            | A5441      | San Luis, MI, USA           | 1:1000-....-....                     |
| ALDH1                                                   | mouse monoclonal  | BD-Biosciences                   | #611194    | Franklin Lakes, NJ, USA     | 1:500-....-....                      |
| Cadherin-E                                              | mouse monoclonal  | A. Cano                          |            | IIB (UAM/CSIC)              | 1:200_1:50_1:20                      |
| Cadherin-P (clone 56C1)                                 | mouse monoclonal  | Novocastra Laboratories          | #610227    | Newcastle, UK               | ....-....-1:200                      |
| CD44-APC                                                | mouse monoclonal  | BD-Biosciences                   | #559942FIT | Franklin Lakes, NJ, USA     | ....-1:20-....                       |
| CD24-PE                                                 | mouse monoclonal  | BD-Biosciences                   | #555428    | Franklin Lakes, NJ, USA     | ....-1:20-....                       |
| Catalase                                                | mouse monoclonal  | Sigma-Aldrich (Merck)            | #C0979     | San Luis, MI, USA           | 1:1000_....-....                     |
| Cyclin D1 (H-295)                                       | rabbit polyclonal | Santa Cruz Biotechnology, Inc.   | sc-753     | Dallas, TX, USA             | 1:1000-....-....                     |
| c-Src (MAb-327)                                         | mouse monoclonal  | J.S. Brugge (Harvard University) |            | Harvard University, MA, USA | 1:1000-....-....                     |
| c-Src (MAb EC10)                                        | mouse monoclonal  | Millipore (Merk)                 | #05-185    | Billerica, MA, USA          | 1:1000-....-....                     |
| c-Src-pY418                                             | rabbit polyclonal | Invitrogen                       | #44660G    | Camarillo, CA, USA          | 1:1000-....-....                     |
| Envision-peroxidase anti-mouse polymer labeled with HRP | goat polyclonal   | Dako Corporation                 | K4000      | Carpinteria, CA, USA        | ....-...._1:100                      |
| ESA-FITC                                                | mouse monoclonal  | Biomeda Corp.                    | FM010      | Foster City, CA, USA        | ....-...._1:20                       |
| Fak                                                     | rabbit polyclonal | Santa Cruz Biotechnology, Inc.   | Sc-557     | Dallas, TX, USA             | 1:1000-....-....                     |
| Fak-pY397                                               | mouse monoclonal  | BD-Biosciences                   | #611722    | Franklin Lakes, NJ, USA     | 1:1000-....-....                     |
| GAPDH (clone 6C5)                                       | mouse monoclonal  | Millipore (Merk)                 | CB1001     | Billerica, MA, USA          | 1:4000_....-....                     |
| Glut-1                                                  | rabbit polyclonal | Santa Cruz Biotechnology, Inc.   | Sc-7903    | Dallas, TX, USA             | 1:1000-....-....                     |
| HK2                                                     | rabbit polyclonal | Cell Signaling Technology        | #C64G5     | Danvers, MA, USA            | 1:1000-....-....                     |
| LDHA                                                    | rabbit polyclonal | Cell Signaling Technology        | #3582      | Danvers, MA, USA            | 1:1000-....-....                     |
| LDHA-pY10                                               | rabbit polyclonal | cell Signaling Technology        | #8176      | Danvers, MA, USA            | 1:1000-....-....                     |
| Mn-SOD                                                  | rabbit polyclonal | Millipore (Merck)                | #06-984    | Billerica, MA, USA          | 1:1000-....-....                     |
| MCT-1                                                   | mouse monoclonal  | Santa Cruz Biotechnology, Inc.   | Sc-365501  | Dallas, TX, USA             | 1:1000-....-....                     |
| Nanog                                                   | rabbit polyclonal | Millipore (Merk)                 | #AB9220    | Billerica, MA, USA          | 1:1000-....-....                     |
| Oct3/4                                                  | goat polyclonal   | Santa Cruz Biotechnology, Inc.   | Sc-8629    | Dallas, TX, USA             | 1:100-....-....                      |
| PARP (clone C-2-10)                                     | mouse monoclonal  | Biomol GmbH                      | SA-249     | Hamburg, Germany            | 1:1000-....-....                     |
| α-Tubulin                                               | mouse monoclonal  | Sigma-Aldrich (Merck)            | T9026      | San Luis, MI, USA           | 1:8000-....-....                     |

**Western Blotting (WB)\***  
**Flow-cytometry (FC)/Immunofluorescence (IF)\*\***  
**Immunohistochemistry (IHC)\*\*\***

**2.11. Table S2. Antibodies employed in these studies.**

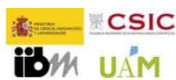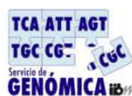

## HUMAN CELL LINE STR PROFILE REPORT

CELL LINE DESCRIPTION according to customer: MCF7 (ATCC ® HTB-22/CVCL\_0031)

Sample Submitted By: Jorge Martín Pérez  
Instituto de Investigaciones Biomédicas. CSIC  
[jmartin@iib.uam.es](mailto:jmartin@iib.uam.es)

Date: 13.12.2018  
Microsatellite Run Number (pdf attached): M192  
Laboratory: Genomics Core Facility.  
Instituto de Investigaciones Biomédicas "Alberto Sols" CSIC-UAM.  
28029 Madrid  
00 34 91 585 44 74 (Tel.) 00 34 91 585 44 01 (Fax)  
[genomica@iib.uam.es](mailto:genomica@iib.uam.es)

### STR PROFILE DATA:

| STR PROFILE OBTAINED              |       | EXPECTED |
|-----------------------------------|-------|----------|
| D5S818                            | 12    | 11,12    |
| D13S317                           | 11    | 11       |
| D7S820                            | 8,9   | 8,9      |
| D16S539                           | 11,12 | 11,12    |
| vWA                               | 14,15 | 14,15    |
| TH01                              | 6     | 6        |
| TPOX                              | 9,12  | 9,12     |
| CSFIPO                            | 10    | 10       |
| D21S11                            | 30    |          |
| Amelogenin                        | X     | X        |
| RESULTS                           |       |          |
| Number of shared alleles: 15      |       |          |
| Number of alleles in database: 16 |       |          |
| Percent match: 93%                |       |          |

### TEST RESULTS:

Query profiles were sent against ATCC database  
Cell lines with  $\geq 80\%$  match are considered to be related (i.e. common ancestor).  
Cell lines with 55%-80% match require further profiling

- ✓ The submitted sample profile is human and matches 93% with customer cell line description
- The submitted sample profile is human, but does not match customer cell line description
- No human STRs are amplified

### DATABASE OUTPUT:

| %Match | ATCC@  | Designation         | D5S818 | D13S317 | D7S820 | D16S539 | vWA   | TH01 | AMEL | TPOX | CSFIPO |
|--------|--------|---------------------|--------|---------|--------|---------|-------|------|------|------|--------|
| 93.0   | HTB-22 | MCF7Breast          | 11,12  | 11      | 8,9    | 11,12   | 14,15 | 6    | X    | 9,12 | 10     |
|        |        | AdenocarcinomaHuman |        |         |        |         |       |      |      |      |        |

### METHOD:

| STR ANALYSIS                  |                                           |
|-------------------------------|-------------------------------------------|
| STR amplification kit         | GenePrint® 10 System (Promega)            |
| STR profile analysis software | GeneMapper® v3.7 (Life Technologies)      |
| Genomic Analyzer System       | ABI 3130 XL (Applied Biosystems)          |
| DNA source                    | Cultured cells; cultured cells pellet     |
| DNA isolation method          | DNeasy blood and tissue kit (Qiagen)      |
| DNA quantification method     | Qubit 2.0 Fluorometer (Life Technologies) |
| Amount of DNA/amplification   | 4 ng                                      |

The GenePrint® 10 System allows co-amplification and three-color detection of ten human loci: TH01, TPOX, vWA, Amelogenin, CSFIPO, D16S539, D7S820, D13S317, D21S11 and D5S818. These loci collectively provide a genetic profile with a random match probability of  $1$  in  $2.92 \times 10^9$  and are used for human cell line and tissue authentication and identification and human cell line cross-contamination determination. Samples are processed using the ABI Prism® 31300xl Genetic Analyzer. Data are analyzed using GeneMapper® ID-X v1.2 software (Applied Biosystems). STRs profiles are sent for comparison against cell line date bases like ATCC (American Type Culture Collection), DSMZ (Deutsche Sammlung von Mikroorganismen and Zellkulturen)...

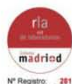

Nº Registro: 381



ELECTROPHEROGRAM

Applied Biosystems  
GeneMapper v3.7

Microsatellites192

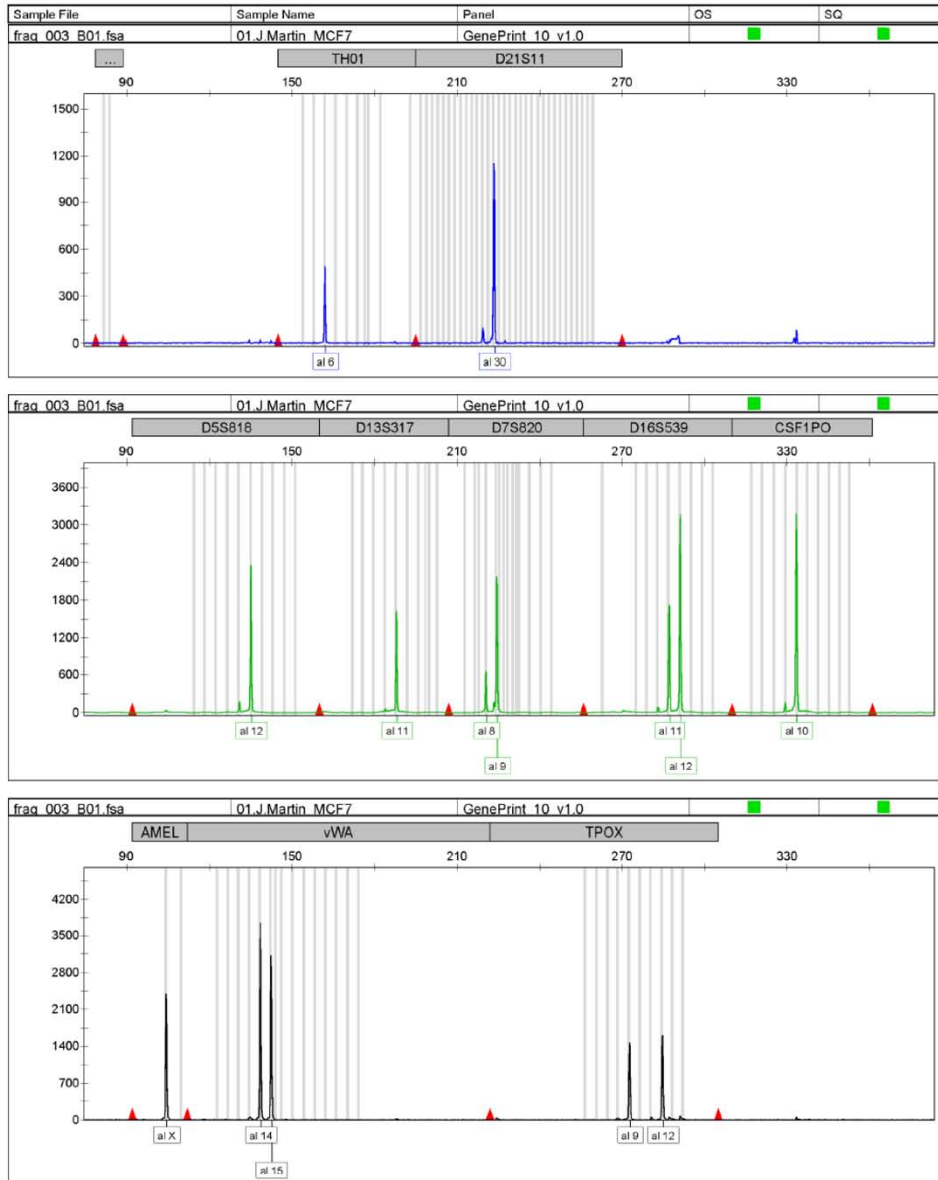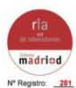

3  
4  
5  
6  
7  
8

**2.12. Reports of MCF7 cell line authentication.** MCF7 cell line was authenticated by short-tandem-repeat analysis (GenePrintR 10 System from Promega, and GeneMapper v3.7 STR profile analysis software, Life Technologies).



Uncropped Immunoblots from Figure\_1

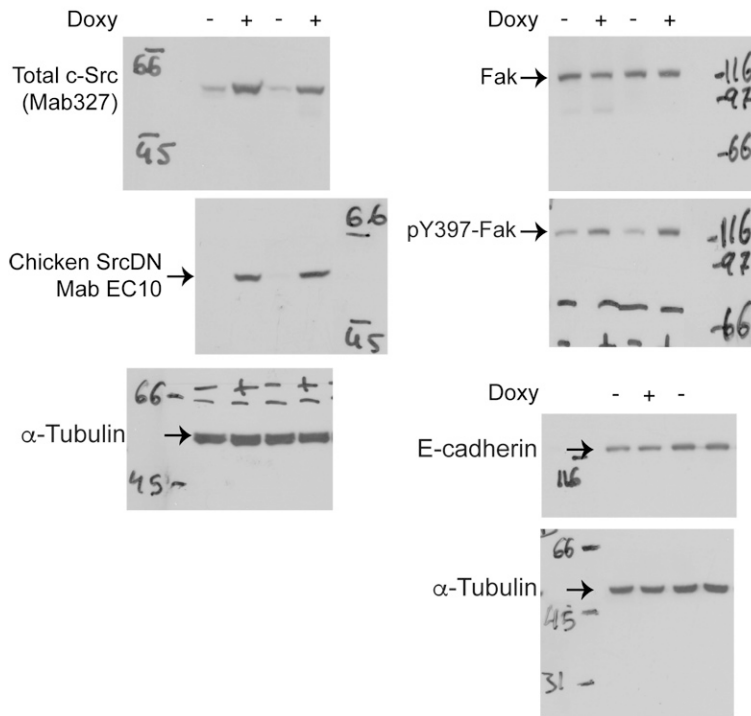

9

Uncropped Immunoblots from Figure\_2

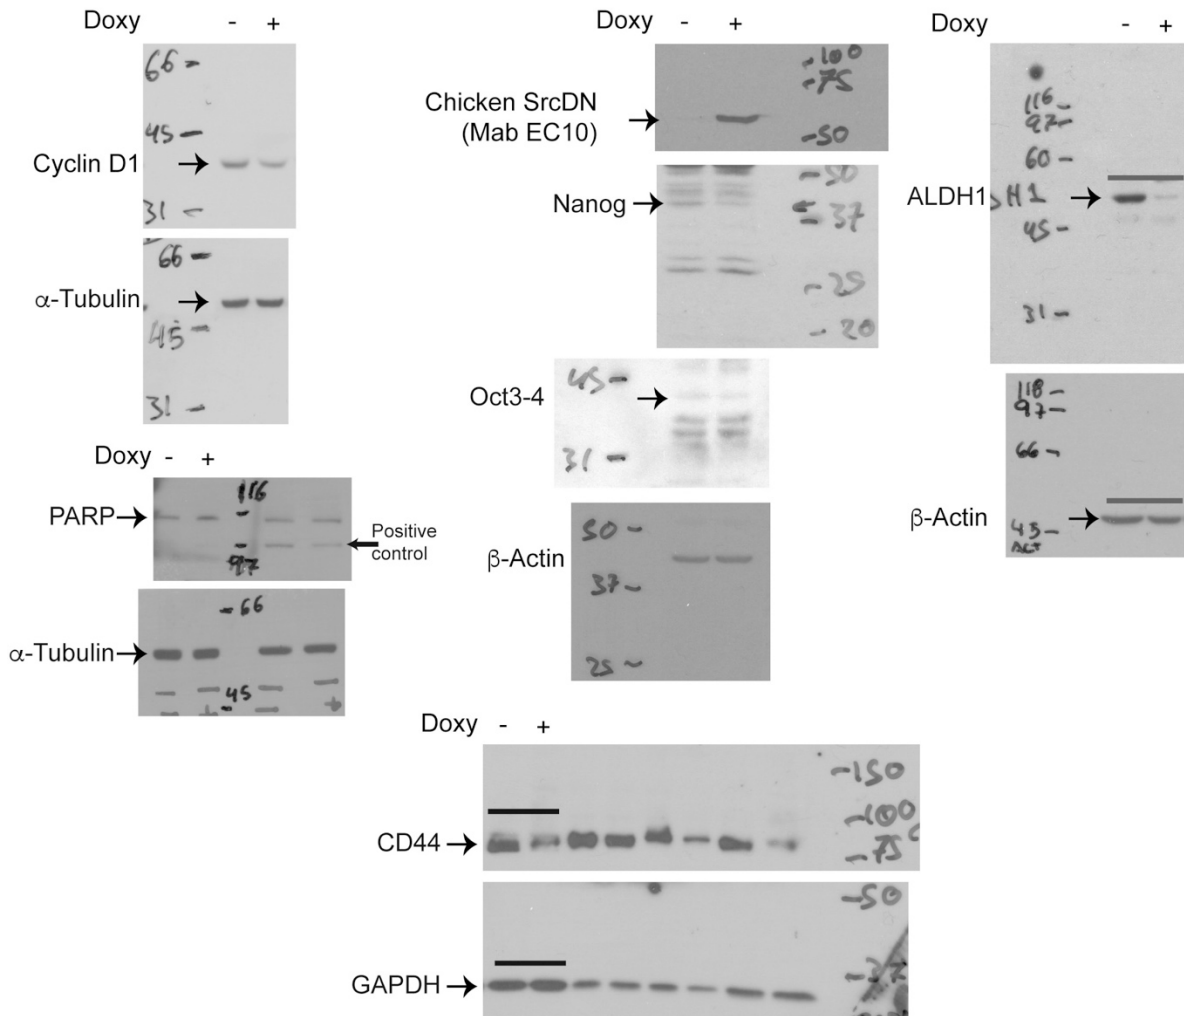

10

Uncropped Immunoblots from Figure\_3

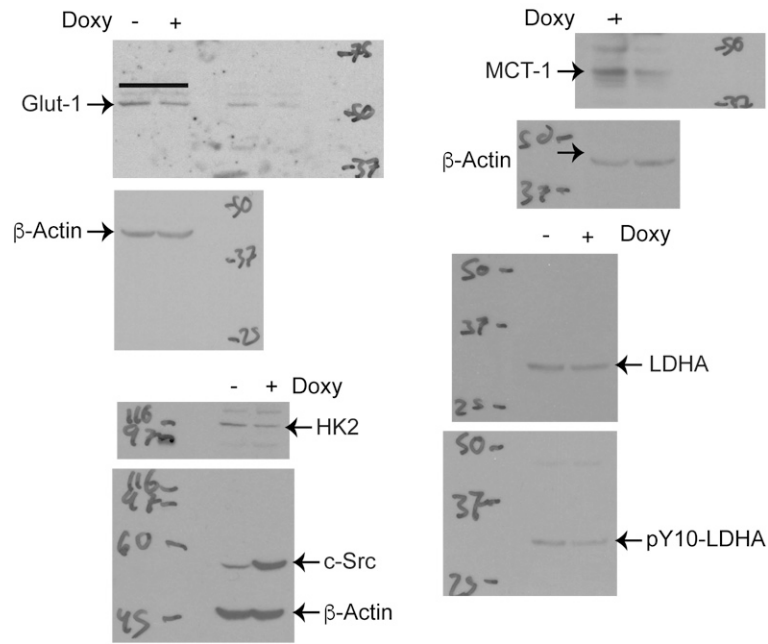

11  
12

Uncropped Immunoblots from Figure\_S8

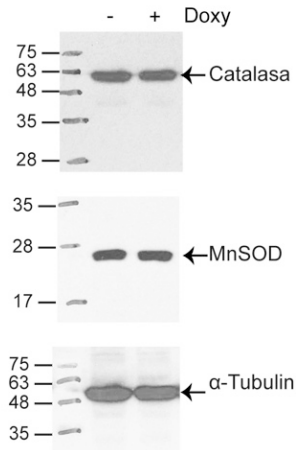

13  
14  
15  
16  
17

**2.13. Figure.** Uncropped scan of the western blots of the manuscript. Since it was difficult (time consuming) to obtain large amounts of samples, we cut the transfer membranes to incubate each of them with antibodies to obtain different results from a single immunoblotting membrane.

MCF7-Tet-On-SrcDN\_Mammospheres (FIGURE 1)

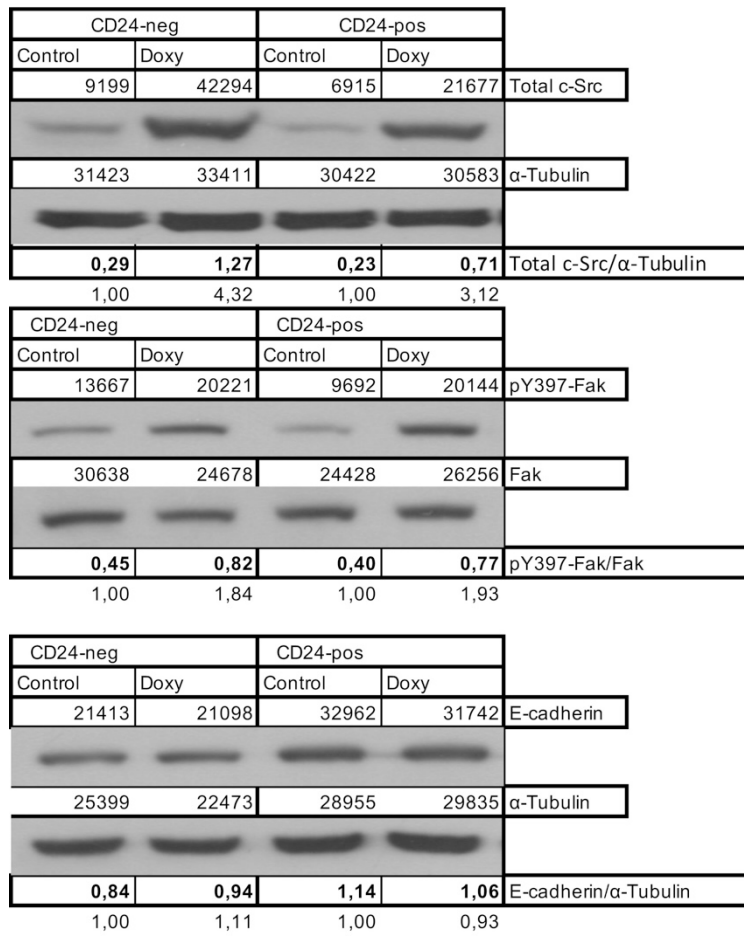

18

MCF7-Tet-On-SrcDN Mammospheres (FIGURE 2)

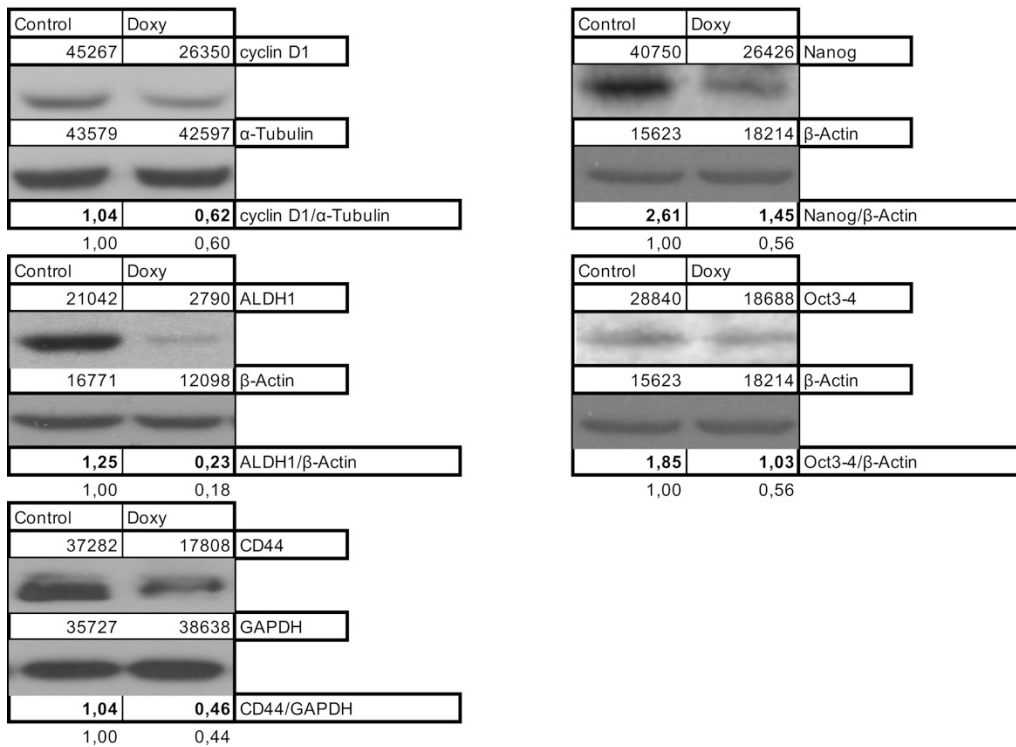

19

MCF7-Tet-On-SrcDN\_Mammospheres (FIGURE 3)

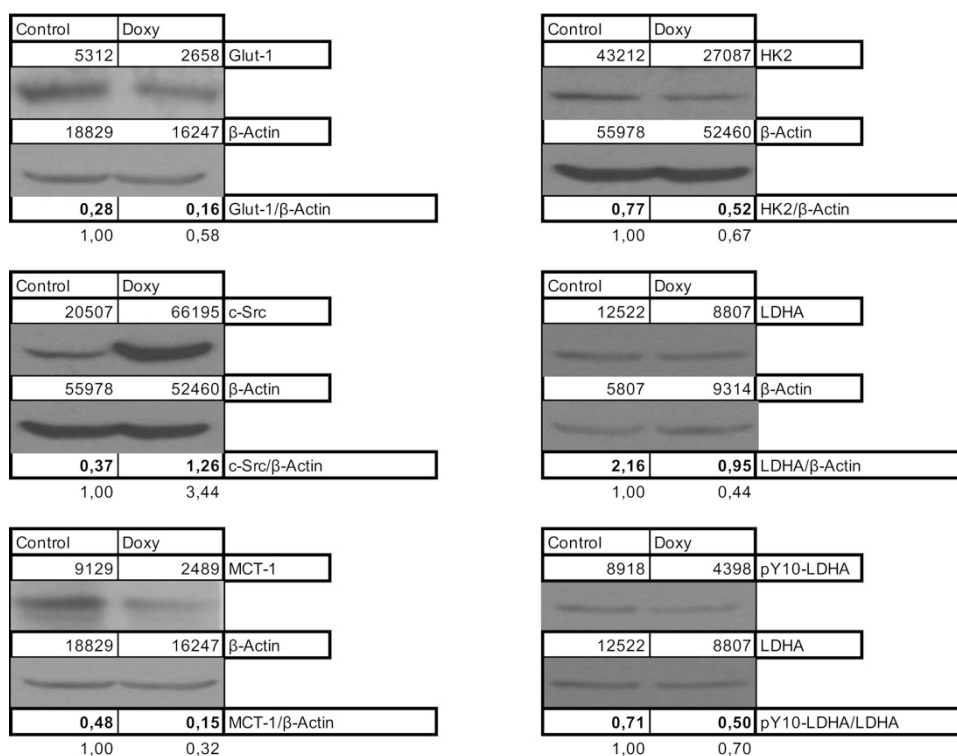

20

MCF7-Tet-On-SrcDN Mammospheres (FIGURE S8)

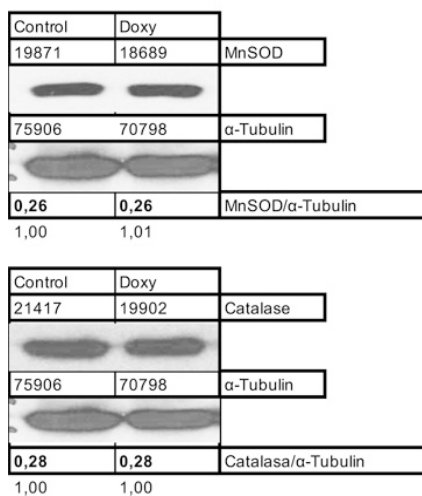

21

22 **2.13.** Quantification of immunoblots.

23

24 **3. References**

- 25 1. Cruz-Bermudez, A.; Vallejo, C.G.; Vicente-Blanco, R.J.; Gallardo, M.E.; Fernandez-Moreno,  
 26 M.A.; Quintanilla, M.; Garesse, R. Enhanced tumorigenicity by mitochondrial DNA mild  
 27 mutations. *Oncotarget* **2015**, *6*, 13628-13643, doi:10.18632/oncotarget.3698.
